# Supplementary material for: Impacts of Pit latrines on Groundwater Quality in Squatter Settlements in Zanzibar
Source: Research Square preprint supplement (doi:10.21203/rs.3.rs-2652203/v1), 2023-03-24
Supplement: Supplementary file 1 [file fbbd37166bba7f5b48d0e0db.docx]

**Table 2:** Characteristics of groundwater wells and pit latrines, along with analyzed results of biological- and physiochemical- parameters of the

groundwater wells at the study area.
